# Supplementary material for: Transcriptome analysis indicated that Salmonella lipopolysaccharide-induced thymocyte death and thymic atrophy were related to TLR4-FOS/JUN pathway in chicks
Source: BMC Genomics. 2016 May 4;17:322. doi: 10.1186/s12864-016-2674-6 (PMC4855877; doi:10.1186/s12864-016-2674-6)
Supplement: Additional file 1: Supplementary figures. — (PDF 1259 kb) [file 12864_2016_2674_MOESM1_ESM.pdf]

# Transcriptome analysis indicated that *Salmonella* lipopolysaccharide-induced thymocyte death and thymic atrophy were related to TLR4-FOS/JUN pathway in chicks

Haibo Huang, An Liu, Hui Wu, Abdur Rahman Ansari, Jixiang Wang, Xiyao Huang, Xing Zhao, Kemei Peng, Juming Zhong and Huazhen Liu

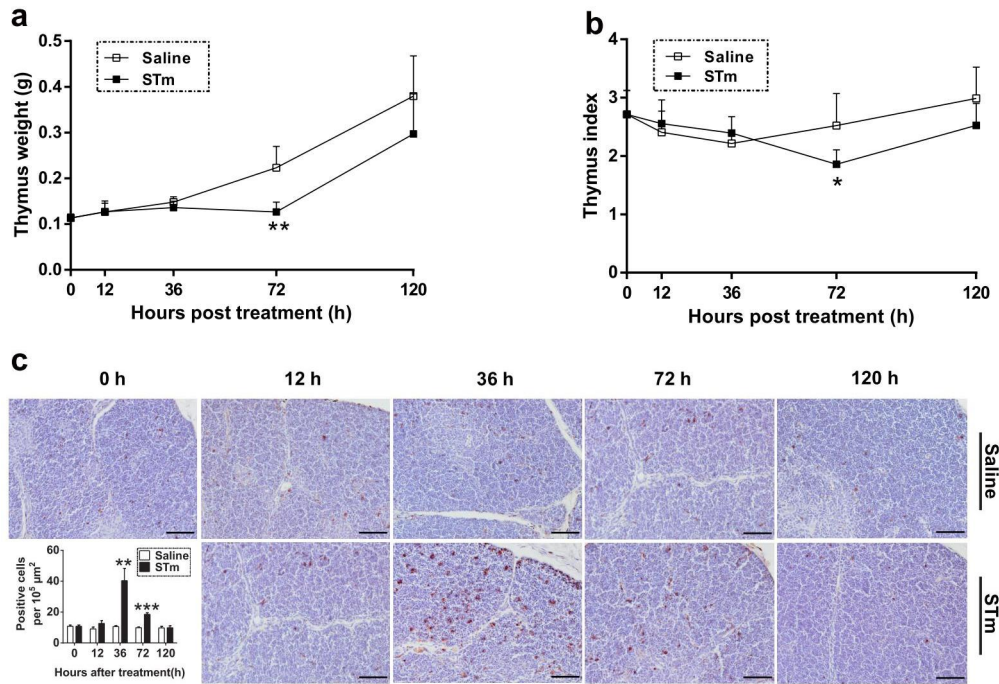

**Figure. S1** STm induced acute thymic injury in chicks. Newly hatched chicks were injected i.p. with 0.5 mL 75% saline or  $5 \times 10^4$  CFU/mL STm and sacrificed at defined time points to evaluate thymic injury. **a**, **b** STm infection reduced thymus weight and index at 72 hpt in chicks ( $n = 6$ ). **c** STm infection increased thymocyte death at 36 and 72 hpt in chicks ( $n = 4 \sim 5$ ). The positive cells were mainly distributed in thymic cortex. At least 5 fields in each section of the thymus were sampled, and positive cells per  $1 \times 10^5 \mu m^2$  in the thymic cortex were quantified. Scale bars = 50  $\mu m$ . All data are presented as means  $\pm$  SD. Statistically significant differences between STm and saline groups at each time point were determined using Student's *t*-test. \* $P < 0.05$ , \*\* $P < 0.01$ , \*\*\* $P < 0.001$ .

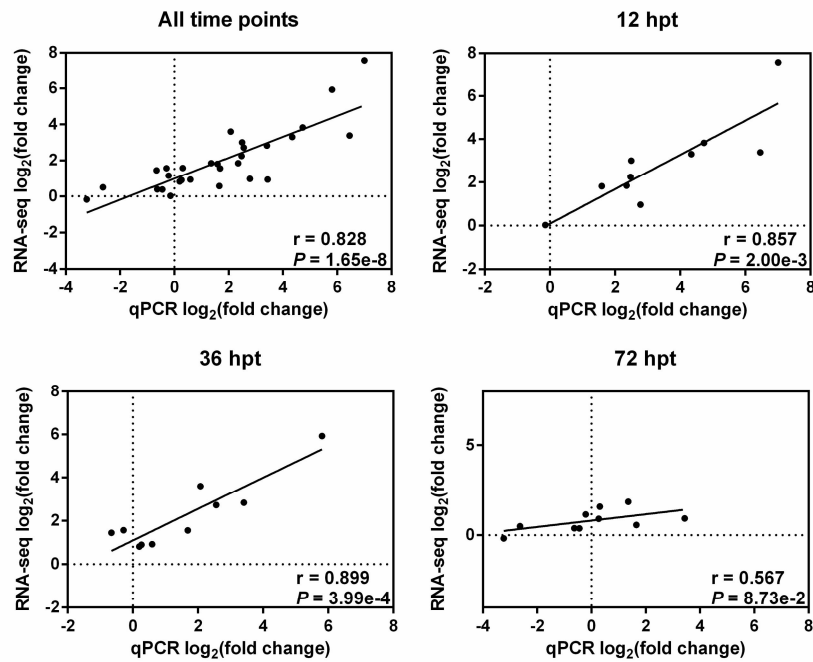

**Figure. S2** Correlation analysis between changes of ten genes (*TLR4*, *TLR15*, *AVD*, *IL8L2*, *BPI*, *SOCS3*, *IL6ST*, *IL1R2*, *HSPB1* and *NOV*) detected by RNA-seq and qPCR methods. Newly hatched chicks were injected i.p. with 50 mg/kg *Salmonella* LPS and sacrificed at defined time points. The log<sub>2</sub>(fold change) values were calculated from relative mRNA expression values (for qPCR data) or RPKM values (for RNA-seq data) between different time points (12 hpt vs. 0 hpt, 36 hpt vs. 0 hpt, 72 hpt vs. 0 hpt). The significance of correlation analysis was detected using Pearson's test. Each point represents one gene per comparisons.

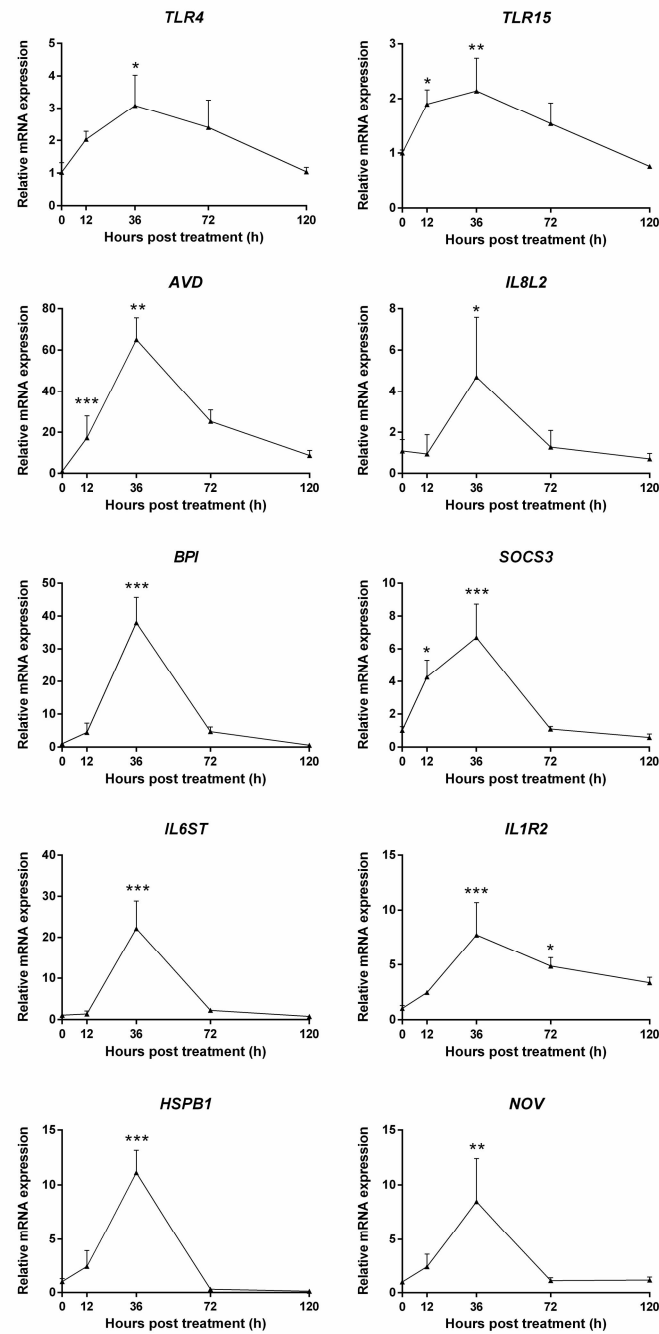

**Figure. S3** Expression of ten genes in chick thymus after STm infection. The qPCR was conducted on ten genes (*TLR4*, *TLR15*, *AVD*, *IL8L2*, *BPI*, *SOCS3*, *IL6ST*, *IL1R2*, *HSPB1* and *NOV*) in chicks ( $n = 3$ ) after STm infection. Statistically significant differences for multiple comparisons (12 hpt vs. 0 hpt, 36 hpt vs. 0 hpt, 72 hpt vs. 0 hpt) were performed with Bonferroni's multiple comparisons test after one-way ANOVA test. \* $P < 0.05$ , \*\* $P < 0.01$ , \*\*\* $P < 0.001$ .

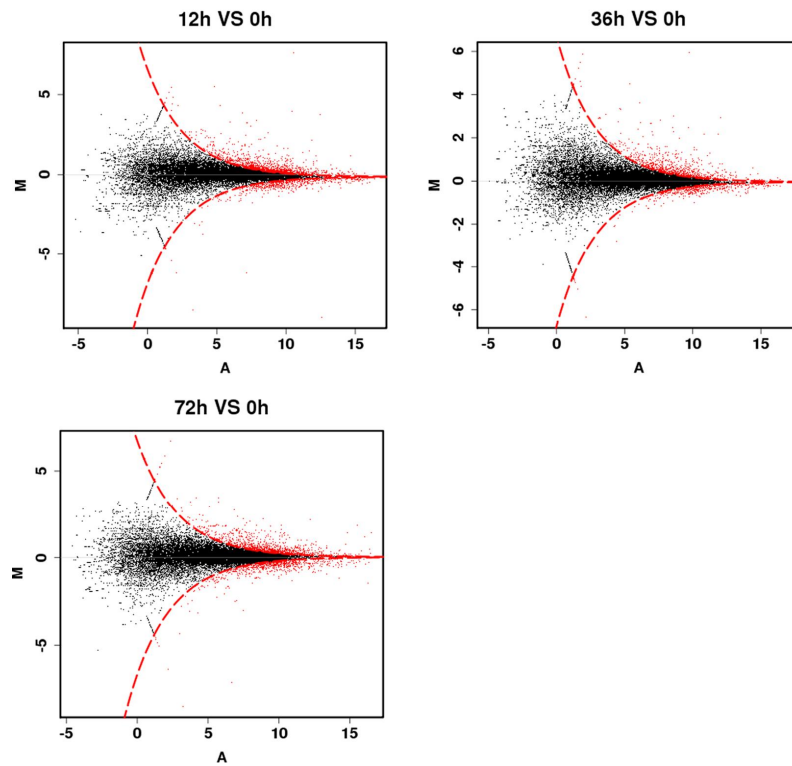

**Figure. S4** Visualization of differential expression from RNA-Seq data using MA-plots. Differential gene expression was depicted as MA-plots between different time points (12 hpt vs. 0 hpt, 36 hpt vs. 0 hpt, 72 hpt vs. 0 hpt). The red line indicate significance threshold ( $P < 0.001$ ). Red points represent transcripts with  $P < 0.001$ .

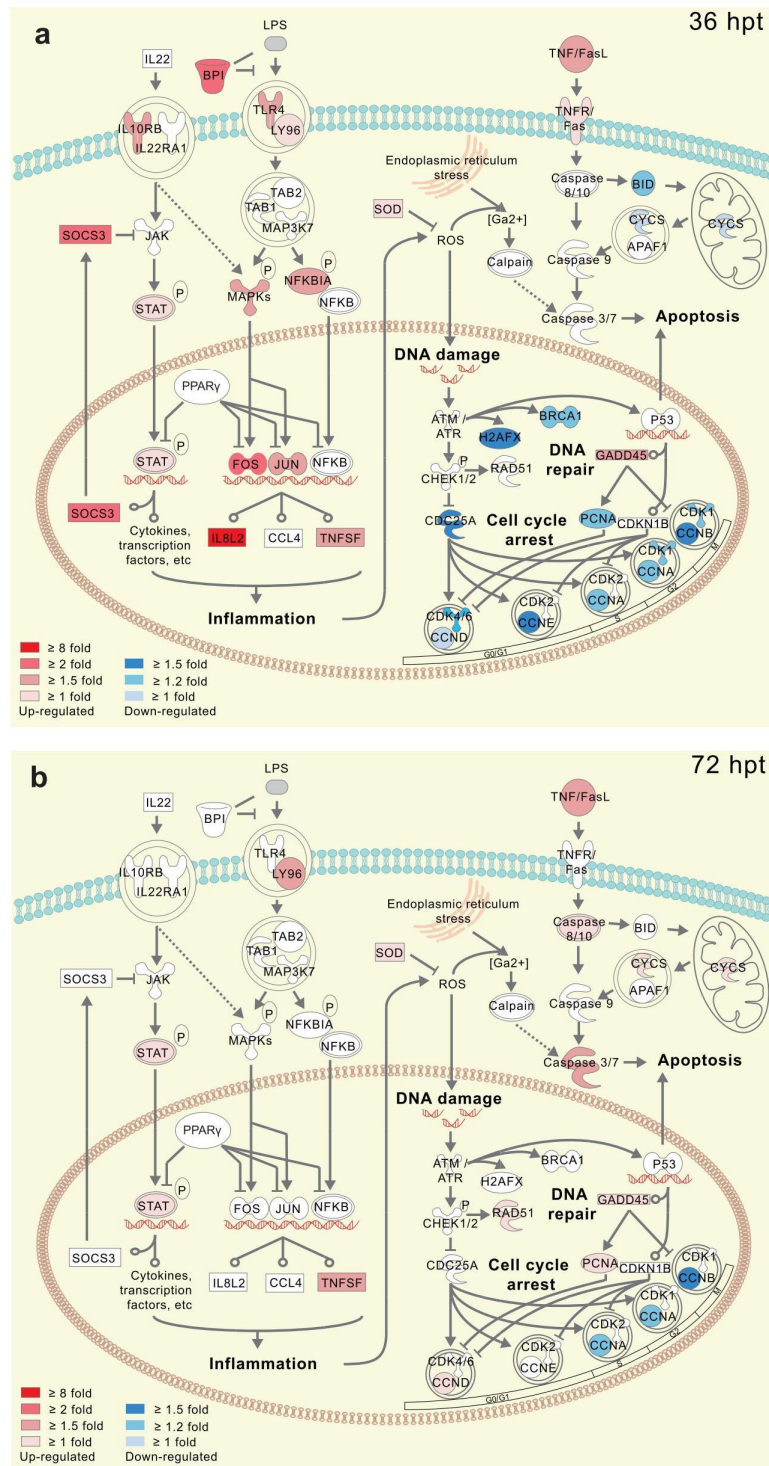

**Figure. S5** IPA pathway enrichment analysis of DEGs in chick thymus at 36 and 72 hpt after *Salmonella* LPS treatment. Merged IPA pathways in chick thymus at 36 hpt (a) and 72 hpt (b) are illustrated based on enrichment analysis of IPA pathways. Red genes represent up-expressed genes, blue depict down-expressed genes and white symbols depict neighboring genes. The color intensity represents the average fold change.
