# Supplementary material for: Transcriptome analysis indicated that Salmonella lipopolysaccharide-induced thymocyte death and thymic atrophy were related to TLR4-FOS/JUN pathway in chicks
Source: BMC Genomics. 2016 May 4;17:322. doi: 10.1186/s12864-016-2674-6 (PMC4855877; doi:10.1186/s12864-016-2674-6)
Supplement: Additional file 4: Table S3. — Detailed information on genes involved in merged IPA pathways at different time point. Genes involved in merged IPA pathways with P < 0.001 were considered. Dashes indicated no significant difference in the genes expression. (XLS 21 kb) [file 12864_2016_2674_MOESM4_ESM.xls]

## Sheet: Sheet1
Tabel S3 Detailed information on genes involed in merged IPA pathways at different time point.
Gene Symbol	Also known as	Fold change
		12 h vs 0 h	36 h vs 0 h	72 h vs 0 h
TLR15		1.9	—	—
TLR4		—	1.9	—
LY96		—	1.4	1.7
RELA	NFKB	—	—	—
NFKBIA		1.1	1.6	—
MAPK1		1.1	—	—
MAPK11		—	1.8	—
FOS		2	2.6	—
JUN		1.3	1.5	—
BPI		9.2~10.4	6.3~7.1	—
IL22		10.8	—	—
IL8L2	IL8	9.9	12.2	—
CCL4		2.5-3.7	—	—
PPARG		1.8	—	—
IL10RB		1.3	1.7	—
STAT1		1.1	1.1	1.2
STAT5B		1	—	—
STAT3		1.2	1.2	—
SOCS3		3.6	3	—
SOD3		2	1.3	1.3
BRCA1		-1.7	-1.3	—
GADD45B		1.5	1.5	1.4
H2AFX		-1.5	-1.5	—
RAD51		-1.7	—	1.4
PCNA		-1.8	-1.2	1.1
CDKN1B		1.2	—	—
STT3A	CHEK1	-1.9	—	—
CDC25A		-1.8	-1.6	—
CCNE2		-2	-1.6	—
CCNB2		-1.8	-1.2	—
CCNB3		-1.8	-1.5	-1.6
CCNA2		-1.7	-1.3	-1.2
CCND3		-1.5	-1.1	1.4
CDK6		-1.4	-1.5	—
CDK1		-1.8	-1.3	—
TP53	P53	—	—	—
CAPN6	Calpain	2.4	—	—
CAPN5	Calpain	1.8	—	—
TNFSF8		—	1.7	1.8
TNFSF10		1.3	—	—
FAS		—	1.3	—
CASP7		—	—	1.5
CASP1		—	—	1.2
CASP3		—	—	1.2
CASP8		—	—	1.2
CYCS		-1.4	-1.1	1.3
BID		-1.4	-1.2	—
